# Supplementary material for: Child Tax Credit, Spending Patterns, and Mental Health: Mediation Analyses of Data from the U.S. Census Bureau’s Household Pulse Survey during COVID-19
Source: MDPI journal article supplement (doi:10.3390/ijerph20054425), 2023-03-01
Supplement: s1 [file s1]

## Supplementary Materials

This material includes supplementary tabulations that were referred in the main text.

**Supplementary Table S1.** Sample Size by Survey Week and Phase.

| Survey Phase | Survey Week | Survey Dates            | Count of Responses |                 |                 |                      |
|--------------|-------------|-------------------------|--------------------|-----------------|-----------------|----------------------|
|              |             |                         | (a)<br>1st-time    | (b)<br>2nd-time | (c)<br>3rd-time | (a + b + c)<br>Total |
| Phase 1      | 1           | April 23–May 5, 2020    | 74,413             | 0               | 0               | 74,413               |
|              | 2           | May 7–12                | 22,411             | 19,585          | 0               | 41,996               |
|              | 3           | May 14–19               | 113,171            | 9,327           | 10,463          | 132,961              |
|              | 4           | May 21–26               | 69,184             | 28,318          | 3,713           | 101,215              |
|              | 5           | May 28–2                | 76,136             | 17,295          | 11,635          | 105,066              |
|              | 6           | June 4–9                | 60,079             | 16,383          | 6,840           | 83,302               |
|              | 7           | June 11–16              | 59,065             | 9,762           | 4,645           | 73,472               |
|              | 8           | June 18–23              | 92,661             | 11,986          | 3,415           | 108,062              |
|              | 9           | June 25–30              | 74,700             | 19,255          | 4,708           | 98,663               |
|              | 10          | July 2–7                | 68,281             | 15,315          | 7,171           | 90,767               |
|              | 11          | July 9–14               | 72,021             | 14,066          | 5,518           | 91,605               |
|              | 12          | July 16–21              | 67,896             | 14,130          | 4,766           | 86,792               |
| Phase 2      | 13          | August 19–31            | 109,051            | 0               | 0               | 109,051              |
|              | 14          | September 2–14          | 110,019            | 0               | 0               | 110,019              |
|              | 15          | September 16–28         | 99,302             | 0               | 0               | 99,302               |
|              | 16          | September 30–October 12 | 95,604             | 0               | 0               | 95,604               |
|              | 17          | October 14–26           | 88,716             | 0               | 0               | 88,716               |
| Phase 3      | 18          | October 28–November 9   | 58,729             | 0               | 0               | 58,729               |
|              | 19          | November 11–23          | 71,939             | 0               | 0               | 71,939               |
|              | 20          | November 25–December 7  | 72,484             | 0               | 0               | 72,484               |
|              | 21          | December 9–21, 2020     | 69,944             | 0               | 0               | 69,944               |
|              | 22          | January 6–18, 2021      | 68,348             | 0               | 0               | 68,348               |
|              | 23          | January 20–February 1   | 80,567             | 0               | 0               | 80,567               |
|              | 24          | February 3–15           | 77,122             | 0               | 0               | 77,122               |
|              | 25          | February 17–March 1     | 77,788             | 0               | 0               | 77,788               |
|              | 26          | March 3–15              | 78,306             | 0               | 0               | 78,306               |
|              | 27          | March 17–29             | 77,104             | 0               | 0               | 77,104               |
| Phase 3.1    | 28          | April 14–26             | 68,913             | 0               | 0               | 68,913               |
|              | 29          | April 28–May 10         | 78,467             | 0               | 0               | 78,467               |
|              | 30          | May 12–24               | 72,897             | 0               | 0               | 72,897               |
|              | 31          | May 26–June 7           | 70,854             | 0               | 0               | 70,854               |
|              | 32          | June 9–21               | 68,067             | 0               | 0               | 68,067               |
|              | 33          | June 23–July 5          | 66,262             | 0               | 0               | 66,262               |
| Phase 3.2    | 34          | July 21–August 2        | 64,562             | 0               | 0               | 64,562               |
|              | 35          | August 4–16             | 68,799             | 0               | 0               | 68,799               |
|              | 36          | August 18–30            | 69,114             | 0               | 0               | 69,114               |
|              | 37          | September 1–13          | 63,536             | 0               | 0               | 63,536               |
|              | 38          | September 15–27         | 59,833             | 0               | 0               | 59,833               |

|                      |    |                                    |           |         |        |           |
|----------------------|----|------------------------------------|-----------|---------|--------|-----------|
|                      | 39 | September 29–October 11            | 57,064    | 0       | 0      | 57,064    |
| Phase 3.3            | 40 | December 1–13                      | 60,826    | 0       | 0      | 60,826    |
|                      | 41 | December 29, 2021–January 10, 2022 | 74,995    | 0       | 0      | 74,995    |
|                      | 42 | January 26–February 7              | 75,482    | 0       | 0      | 75,482    |
| Phase 3.4            | 43 | March 2–14                         | 84,158    | 0       | 0      | 84,158    |
|                      | 44 | March 30–April 11                  | 63,769    | 0       | 0      | 63,769    |
|                      | 45 | April 27–May 9                     | 61,767    | 0       | 0      | 61,767    |
| Phase 3.5            | 46 | June 1–13                          | 62,826    | 0       | 0      | 62,826    |
|                      | 47 | June 29–July 11                    | 58,304    | 0       | 0      | 58,304    |
|                      | 48 | July 27–August 8, 2022             | 46,801    | 0       | 0      | 46,801    |
| Sum of Weeks 1 to 48 |    |                                    | 3,482,337 | 175,422 | 62,874 | 3,720,633 |
| % of Total Responses |    |                                    | 93.6      | 4.7     | 1.7    | 100.0     |

*Notes:* The shaded rows present the period of analysis. This table is an updated and revised version of Supplementary Table 1 in Park & Kim (2021), presenting the unweighted count of responses. If weighted by person-weight (*pweight* in HPS microdata), each survey week represents the adult (ages 18+) population of 249,170,916 in 2020, 250,265,449 in 2021, and 252,481,011 in 2022. If weighted by household-weight (*hweight* in HPS microdata; only available in phase 2 and later phases of HPS), each week represents the total households of 121,520,180 in 2020, 122,798,192 in 2021, and 124,345,410 in 2022.

*Sources:* U.S. Census Bureau's Household Pulse Survey (HPS) Public Use File (PUF).

**Supplementary Table S2.** Household Pulse Survey Questions and Answer Choices for Variables in the Model.

| Variable                                     | Survey Question                                                                                                                                              | Survey Answer Choices                                                       |
|----------------------------------------------|--------------------------------------------------------------------------------------------------------------------------------------------------------------|-----------------------------------------------------------------------------|
| <b>Exposures</b>                             |                                                                                                                                                              |                                                                             |
| Receipt of CTC during the COVID-19 pandemic  | In the last 4 weeks, did you receive a refund from your 2021 tax return?                                                                                     | 1) Yes, 2) No                                                               |
|                                              | Thinking about your use of the payments from the “Child Tax Credit” did you:                                                                                 | 1) Mostly spend it<br>2) Mostly save it<br>3) Mostly use it to pay off debt |
| <b>Mediators</b>                             |                                                                                                                                                              |                                                                             |
| <i>CTC spending on basic necessities</i>     |                                                                                                                                                              |                                                                             |
| Food                                         | What did you and your household mostly spend the “Child Tax Credit” portion of your refund on? Select all that apply. Food (groceries, eating out, take out) | 1) Yes, 2) No                                                               |
| Rent or mortgage                             | Rent or mortgage (scheduled or monthly)                                                                                                                      | 1) Yes, 2) No                                                               |
| Clothing                                     | Clothing (clothing, accessories, shoes)                                                                                                                      | 1) Yes, 2) No                                                               |
| <i>CTC spending on child education</i>       |                                                                                                                                                              |                                                                             |
| Childcare                                    | Childcare (formal facility, paying family or caregiver directly)                                                                                             | 1) Yes, 2) No                                                               |
| Schoolbooks and supplies                     | School books and supplies                                                                                                                                    | 1) Yes, 2) No                                                               |
| School tuition                               | School tuition                                                                                                                                               | 1) Yes, 2) No                                                               |
| Tutoring services                            | Tutoring services                                                                                                                                            | 1) Yes, 2) No                                                               |
| Afterschool programs                         | After school programs (other than tutoring and childcare)                                                                                                    | 1) Yes, 2) No                                                               |
| Transportation for school                    | Transportation for school (bus service, metro, etc..)                                                                                                        | 1) Yes, 2) No                                                               |
| Recreational goods                           | Recreational goods (sports and fitness equipment, bicycles, toys, games)                                                                                     | 1) Yes, 2) No                                                               |
| <i>CTC spending on household expenditure</i> |                                                                                                                                                              |                                                                             |
| Utilities and telecommunications             | Utilities and telecommunications (natural gas, electricity, cable, internet, cellphone)                                                                      | 1) Yes, 2) No                                                               |
| Vehicle payments                             | Vehicle payments (scheduled or monthly)                                                                                                                      | 1) Yes, 2) No                                                               |
| Paying down credit card or debts             | Paying down credit card, student loans, or other debts                                                                                                       | 1) Yes, 2) No                                                               |
| Savings or investments                       | Savings or investments                                                                                                                                       | 1) Yes, 2) No                                                               |
| Charitable donations or giving to family     | Charitable donations or giving to family members                                                                                                             | 1) Yes, 2) No                                                               |
| <b>Covariates</b>                            |                                                                                                                                                              |                                                                             |
| <i>Demographic characteristics</i>           |                                                                                                                                                              |                                                                             |
| Age                                          | What year were you born? Please enter a number.                                                                                                              | 1932–2002                                                                   |
| Gender                                       | Are you?                                                                                                                                                     | 1) Male<br>2) Female                                                        |

|                                   |                                                                                                                        |                                                                                                                                                                                                                                                                                                                                               |
|-----------------------------------|------------------------------------------------------------------------------------------------------------------------|-----------------------------------------------------------------------------------------------------------------------------------------------------------------------------------------------------------------------------------------------------------------------------------------------------------------------------------------------|
| Race/ethnicity                    | Are you of Hispanic, Latino, or Spanish origin? - Selected Choice                                                      | 1) No, not of Hispanic, Latino, or Spanish origin<br>2) Yes, of Hispanic, Latino, or Spanish origin                                                                                                                                                                                                                                           |
|                                   | What is your race? Please select all that apply. - Selected Choice                                                     | 1) White, Alone<br>2) Black, Alone<br>3) Asian, Alone<br>4) Any other race alone, or race in combination                                                                                                                                                                                                                                      |
| Marital status                    | What is your marital status?                                                                                           | 1) Now married<br>2) Widowed<br>3) Divorced<br>4) Separated<br>5) Never married                                                                                                                                                                                                                                                               |
| Children in household             | How many people under 18 years-old currently live in your household? Please enter a number.                            | (0–40) number of people under 18 (whole number)                                                                                                                                                                                                                                                                                               |
| Household size                    | How many total people-adults and children-currently live in your household, including yourself? Please enter a number. | (1–40) number of people (whole number)                                                                                                                                                                                                                                                                                                        |
| <i>Socioeconomic status (SES)</i> |                                                                                                                        |                                                                                                                                                                                                                                                                                                                                               |
| Education                         | What is the highest degree or level of school you have completed?                                                      | 1) Less than high school<br>2) Some high school<br>3) High school graduate or equivalent (for example GED)<br>4) Some college, but degree not received or is in progress<br>5) Associate's degree (for example AA, AS)<br>6) Bachelor's degree (for example BA, BS, AB)<br>7) Graduate degree (for example master's, professional, doctorate) |
| Household income                  | In 2019 what was your total household income before taxes?                                                             | 1) Less than \$25,000<br>2) \$25,000–\$34,999<br>3) \$35,000–\$49,999<br>4) \$50,000–\$74,999<br>5) \$75,000–\$99,999<br>6) \$100,000–\$149,999<br>7) \$150,000–\$199,999<br>8) \$200,000 and above                                                                                                                                           |

***Health insurance status***

Public health insurance

Are you currently covered by any of the following types of health insurance or health coverage plans? Mark Yes or No for each.

1) Yes, Has Public Health Insurance

2) No Public Health Insurance

Private health insurance

Are you currently covered by any of the following types of health insurance or health coverage plans? Mark Yes or No for each.

1) Yes, Has Private Health Insurance

2) No Private Health Insurance

***Location of residence***

15 largest metropolitan statistical area

Data based on the HPS respondent's complete current street address

–

States and Washington, D.C.

Data based on the HPS respondent's complete current street address

–

---

*Sources:* U.S. Census Bureau's Household Pulse Survey (HPS) Public Use File (PUF).

**Supplementary Table S3.** Pearson Correlation Coefficient ( $r$ ) Between Mediating Variables.

|                | Food   | Rent   | Clothing | Child care | School books | School tuition | Tutoring | After school | Transport | Recreation | Utilities | Vehicle | Credit card | Savings | Donations |
|----------------|--------|--------|----------|------------|--------------|----------------|----------|--------------|-----------|------------|-----------|---------|-------------|---------|-----------|
| Food           | 1.000  |        |          |            |              |                |          |              |           |            |           |         |             |         |           |
| Rent           | 0.319  | 1.000  |          |            |              |                |          |              |           |            |           |         |             |         |           |
| Clothing       | 0.426  | 0.186  | 1.000    |            |              |                |          |              |           |            |           |         |             |         |           |
| Childcare      | 0.086  | 0.047  | 0.052    | 1.000      |              |                |          |              |           |            |           |         |             |         |           |
| School books   | 0.218  | 0.095  | 0.376    | 0.016      | 1.000        |                |          |              |           |            |           |         |             |         |           |
| School tuition | 0.032  | 0.021  | 0.042    | 0.070      | 0.128        | 1.000          |          |              |           |            |           |         |             |         |           |
| Tutoring       | 0.042  | 0.014  | 0.052    | 0.039      | 0.096        | 0.083          | 1.000    |              |           |            |           |         |             |         |           |
| After school   | 0.080  | 0.032  | 0.100    | 0.115      | 0.118        | 0.072          | 0.108    | 1.000        |           |            |           |         |             |         |           |
| Transport      | 0.137  | 0.139  | 0.159    | 0.043      | 0.141        | 0.050          | 0.056    | 0.076        | 1.000     |            |           |         |             |         |           |
| Recreation     | 0.106  | 0.062  | 0.185    | 0.015      | 0.117        | 0.032          | 0.052    | 0.130        | 0.089     | 1.000      |           |         |             |         |           |
| Utilities      | 0.367  | 0.508  | 0.240    | 0.011      | 0.132        | 0.004          | 0.008    | 0.025        | 0.164     | 0.080      | 1.000     |         |             |         |           |
| Vehicle        | 0.212  | 0.386  | 0.152    | 0.044      | 0.084        | 0.024          | 0.019    | 0.038        | 0.114     | 0.074      | 0.393     | 1.000   |             |         |           |
| Credit card    | 0.066  | 0.161  | 0.039    | -0.008     | 0.022        | 0.007          | 0.011    | 0.011        | 0.036     | 0.041      | 0.180     | 0.233   | 1.000       |         |           |
| Savings        | -0.281 | -0.164 | -0.155   | -0.099     | -0.114       | -0.055         | -0.025   | -0.045       | -0.057    | -0.020     | -0.187    | -0.099  | -0.130      | 1.000   |           |
| Donations      | 0.036  | 0.049  | 0.050    | 0.008      | 0.036        | 0.032          | 0.045    | 0.038        | 0.036     | 0.105      | 0.045     | 0.049   | 0.050       | 0.046   | 1.000     |

*Note.* This table presents Pearson correlation coefficient ( $r$ ) between mediating variables in the model. *Source.* U.S. Census Bureau's Household Pulse Survey Public Use File (PUF).

**Supplementary Table S4.** Descriptive Statistics of Samples across States in the U.S.

| Variables                      | Full Sample<br>(n = 98,026),<br>%, Mean (SD) | Generalized Anxiety Disorder         |                                     | Major Depressive Disorder            |                                     |
|--------------------------------|----------------------------------------------|--------------------------------------|-------------------------------------|--------------------------------------|-------------------------------------|
|                                |                                              | Yes<br>(n = 30,604),<br>%, Mean (SD) | No<br>(n = 67,422),<br>%, Mean (SD) | Yes<br>(n = 20,367),<br>%, Mean (SD) | No<br>(n = 77,659),<br>%, Mean (SD) |
| <i>Location of residence</i>   |                                              |                                      |                                     |                                      |                                     |
| States and Washington,<br>D.C. |                                              |                                      |                                     |                                      |                                     |
| Alabama                        | 1.6                                          | 1.7                                  | 1.5                                 | 1.8                                  | 1.5                                 |
| Alaska                         | 0.2                                          | 0.2                                  | 0.2                                 | 0.2                                  | 0.3                                 |
| Arizona                        | 2.5                                          | 2.6                                  | 2.5                                 | 2.6                                  | 2.5                                 |
| Arkansas                       | 1.0                                          | 1.2                                  | 0.9                                 | 1.3                                  | 0.9                                 |
| California                     | 10.8                                         | 10.2                                 | 11.2                                | 10.4                                 | 11.0                                |
| Colorado                       | 1.8                                          | 1.6                                  | 1.8                                 | 1.6                                  | 1.8                                 |
| Connecticut                    | 1.0                                          | 1.0                                  | 1.0                                 | 0.9                                  | 1.0                                 |
| Delaware                       | 0.3                                          | 0.3                                  | 0.3                                 | 0.3                                  | 0.3                                 |
| District of Columbia           | 0.1                                          | 0.1                                  | 0.2                                 | 0.1                                  | 0.1                                 |
| Florida                        | 6.1                                          | 7.2                                  | 5.6                                 | 6.8                                  | 5.9                                 |
| Georgia                        | 3.4                                          | 3.4                                  | 3.4                                 | 3.4                                  | 3.4                                 |
| Hawaii                         | 0.5                                          | 0.4                                  | 0.5                                 | 0.5                                  | 0.5                                 |
| Idaho                          | 0.7                                          | 0.6                                  | 0.7                                 | 0.6                                  | 0.7                                 |
| Illinois                       | 3.6                                          | 3.2                                  | 3.8                                 | 3.2                                  | 3.7                                 |
| Indiana                        | 2.1                                          | 2.1                                  | 2.2                                 | 2.1                                  | 2.2                                 |
| Iowa                           | 1.0                                          | 0.9                                  | 1.1                                 | 0.8                                  | 1.1                                 |
| Kansas                         | 0.9                                          | 0.9                                  | 1.0                                 | 0.9                                  | 1.0                                 |
| Kentucky                       | 1.5                                          | 1.6                                  | 1.4                                 | 1.7                                  | 1.4                                 |
| Louisiana                      | 1.3                                          | 1.7                                  | 1.2                                 | 1.8                                  | 1.2                                 |
| Maine                          | 0.4                                          | 0.5                                  | 0.4                                 | 0.4                                  | 0.4                                 |
| Maryland                       | 1.9                                          | 1.8                                  | 2.0                                 | 1.9                                  | 2.0                                 |
| Massachusetts                  | 1.9                                          | 1.7                                  | 2.0                                 | 1.6                                  | 2.0                                 |
| Michigan                       | 2.9                                          | 2.9                                  | 3.0                                 | 2.9                                  | 2.9                                 |
| Minnesota                      | 1.7                                          | 1.4                                  | 1.8                                 | 1.3                                  | 1.9                                 |
| Mississippi                    | 1.0                                          | 1.1                                  | 0.9                                 | 1.1                                  | 0.9                                 |
| Missouri                       | 1.9                                          | 2.0                                  | 1.9                                 | 2.1                                  | 1.9                                 |
| Montana                        | 0.3                                          | 0.3                                  | 0.3                                 | 0.3                                  | 0.3                                 |
| Nebraska                       | 0.6                                          | 0.5                                  | 0.7                                 | 0.5                                  | 0.7                                 |
| Nevada                         | 1.0                                          | 1.1                                  | 0.9                                 | 1.3                                  | 0.9                                 |
| New Hampshire                  | 0.4                                          | 0.4                                  | 0.4                                 | 0.4                                  | 0.4                                 |
| New Jersey                     | 2.5                                          | 2.2                                  | 2.6                                 | 2.2                                  | 2.5                                 |
| New Mexico                     | 0.7                                          | 0.7                                  | 0.7                                 | 0.7                                  | 0.7                                 |
| New York                       | 5.4                                          | 4.8                                  | 5.7                                 | 4.6                                  | 5.6                                 |
| North Carolina                 | 3.3                                          | 3.3                                  | 3.4                                 | 3.0                                  | 3.4                                 |
| North Dakota                   | 0.3                                          | 0.2                                  | 0.3                                 | 0.2                                  | 0.3                                 |
| Ohio                           | 3.8                                          | 3.8                                  | 3.8                                 | 3.7                                  | 3.9                                 |
| Oklahoma                       | 1.3                                          | 1.5                                  | 1.3                                 | 1.6                                  | 1.3                                 |
| Oregon                         | 1.3                                          | 1.4                                  | 1.3                                 | 1.3                                  | 1.3                                 |
| Pennsylvania                   | 3.6                                          | 3.7                                  | 3.5                                 | 3.7                                  | 3.5                                 |
| Rhode Island                   | 0.3                                          | 0.3                                  | 0.3                                 | 0.2                                  | 0.3                                 |
| South Carolina                 | 1.7                                          | 1.5                                  | 1.8                                 | 1.5                                  | 1.8                                 |
| South Dakota                   | 0.3                                          | 0.3                                  | 0.3                                 | 0.3                                  | 0.3                                 |
| Tennessee                      | 2.1                                          | 2.4                                  | 2.0                                 | 2.6                                  | 2.0                                 |
| Texas                          | 9.8                                          | 10.3                                 | 9.5                                 | 10.7                                 | 9.5                                 |
| Utah                           | 1.2                                          | 1.2                                  | 1.3                                 | 1.2                                  | 1.2                                 |
| Vermont                        | 0.2                                          | 0.2                                  | 0.2                                 | 0.2                                  | 0.2                                 |
| Virginia                       | 2.8                                          | 2.7                                  | 2.8                                 | 2.8                                  | 2.8                                 |
| Washington                     | 2.3                                          | 2.5                                  | 2.3                                 | 2.4                                  | 2.3                                 |

|               |     |     |     |     |     |
|---------------|-----|-----|-----|-----|-----|
| West Virginia | 0.6 | 0.6 | 0.5 | 0.7 | 0.5 |
| Wisconsin     | 1.7 | 1.4 | 1.9 | 1.5 | 1.8 |
| Wyoming       | 0.2 | 0.2 | 0.2 | 0.2 | 0.2 |

---

*Note.* This table supplements Table 1 in main text.
